# Supplementary material for: Edge functionalization of graphyne nanoribbons for lithium-ion battery electrodes: a computational study
Source: Royal Society of Chemistry journal article supplement (doi:10.1039/d5nr04519c), 2026-01-01
Supplement: d5nr04519c1.pdf [file d5nr04519c1.pdf]

**Edge functionalization of graphyne nanoribbons for lithium-ion battery electrodes: A  
computational study**

Raul Ekberg Dias,<sup>a</sup> Alexandre Lopes de Magalhães<sup>\*a</sup>

<sup>a</sup> LAQV/Requimte, Departamento de Química e Bioquímica, Faculdade de Ciências da

Universidade do Porto, Rua do Campo Alegre, s/n, 4169-007 Porto, Portugal

Dias, R.E.; E-mail: raul.ekberg@fc.up.pt

\* Magalhaes A.L., Corresponding Author; Tel. +351 220402504; E-mail:

almagalh@fc.up.pt

## Solvation parameters

The required PCM inputs for custom solvents are the solvent radius ( $r$ ), static dielectric constant ( $\epsilon_s$ ) and dynamic dielectric constant ( $\epsilon_d$ ), also known as optic dielectric constant. Due to the lack of empirical data for  $\epsilon_d$  and  $r$  of the exact mixture used, the  $\epsilon_d$  has been approximated<sup>1</sup> to be the square of the mixture's refractive index ( $n_m$ ) and determined through a series of equations (Eq. 1-4).<sup>2</sup>

$$v = \frac{M}{\rho} \quad (1)$$

$$\varphi = \frac{x_i \times v_i}{\sum x_t \times v_t} \quad (2)$$

$$\frac{n_m^2 - 1}{n_m^2 + 2} = \varphi_1 \times \frac{n_1^2 - 1}{n_1^2 + 2} + \varphi_2 \times \frac{n_2^2 - 1}{n_2^2 + 2} \quad (3)$$

$$\epsilon_d = n_m^2 \quad (4)$$

To start, the molar volumes ( $v$ ) were calculated using the molar mass ( $M$ ) and densities ( $\rho$ ) of EC and DMC.<sup>3</sup> Then, the volume fractions ( $\varphi$ ) were determined using the molar volumes and the 8:2 EC/DMC molar fractions of the mixture. The mixture's refractive index was calculated with the volume fractions and the refractive indices of each pure solvent ( $n_1, n_2$ )<sup>4,5</sup> and finally the dynamic dielectric constant used in the PCM was determined.

Lastly, the solvent radius parameter was determined from the mixture molecular mass ( $m$ ), the packing density ( $\Delta_{pd}$ ), and density ( $\rho$ ).<sup>3</sup> The packing density was set as 0.5 because the experimental value for the crystal structure of this exact mixture is not known.

$$r^3 = \frac{3 \times m \times \Delta_{pd}}{4 \times \pi \times \rho} \times (10^{24}) \quad (5)$$

## Electrostatic potential maps

G

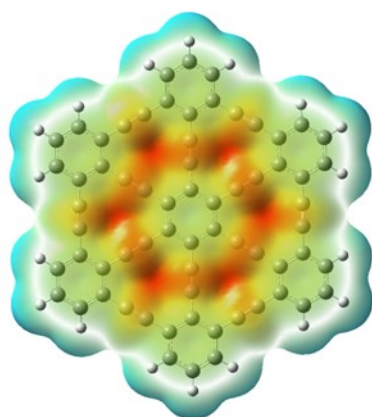

GmCOOH

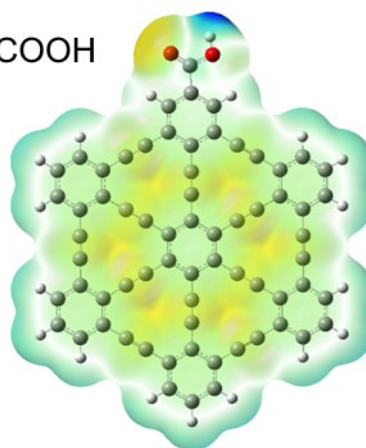

Gu2COOH

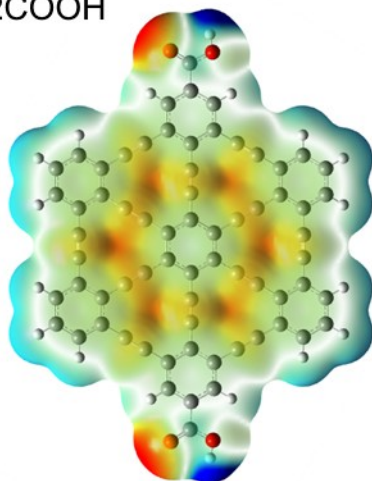

Gu3COOH

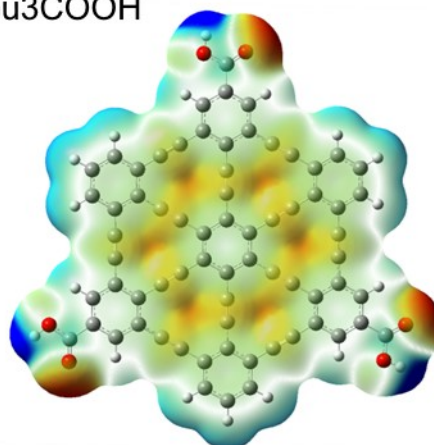

Gu4COOH

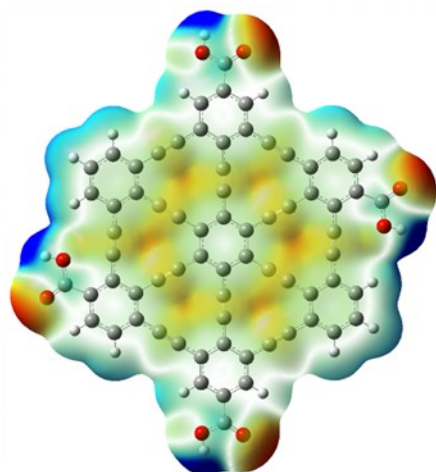

Gl2COOH

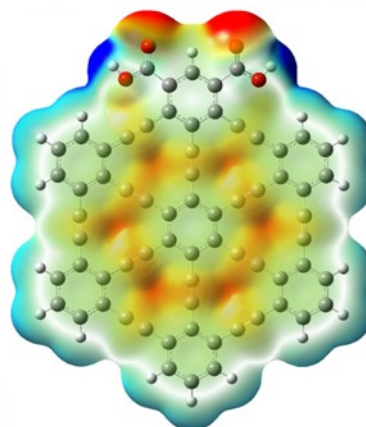

-0.4 a.u.  +0.4 a.u.

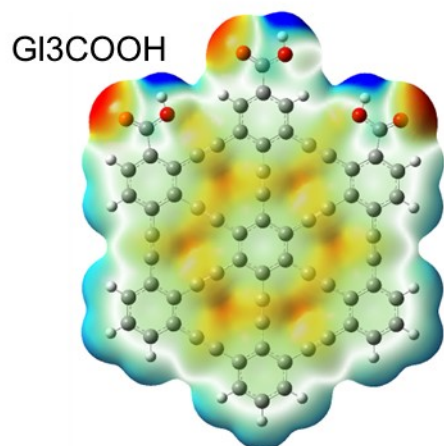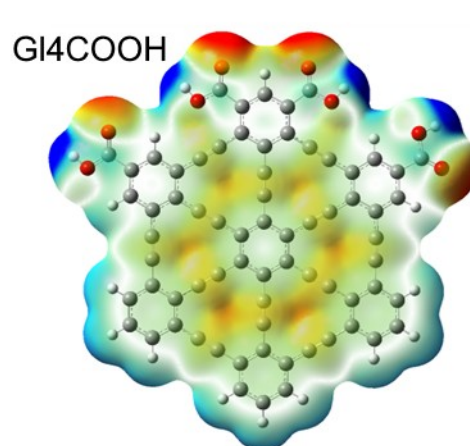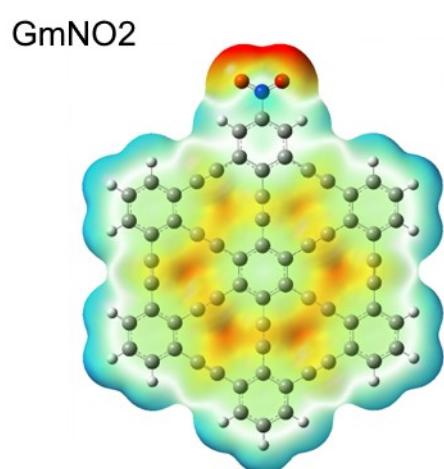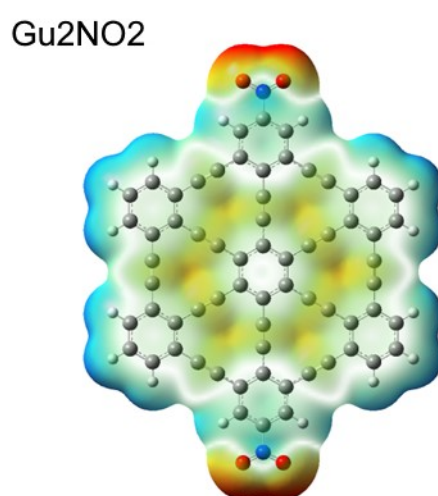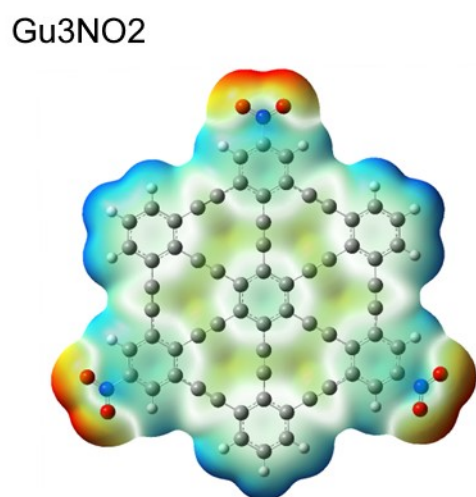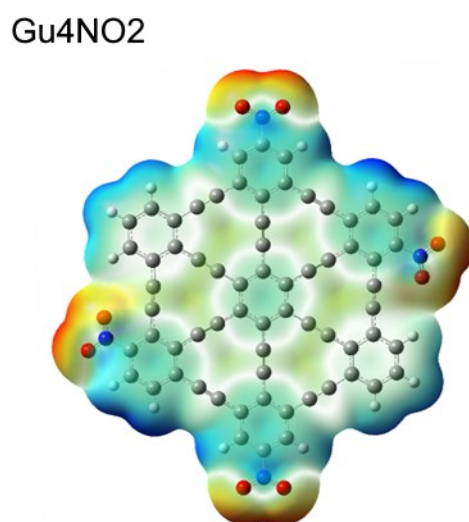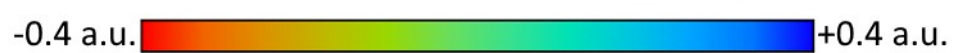

GI2NO2

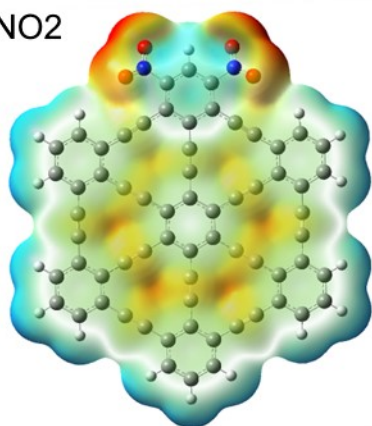

GI3NO2

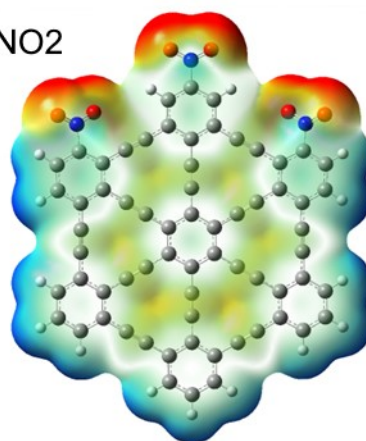

GI4NO2

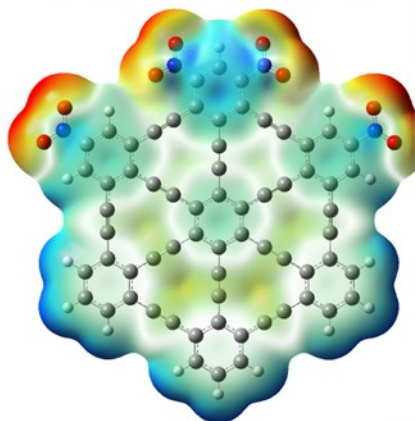

GmCN

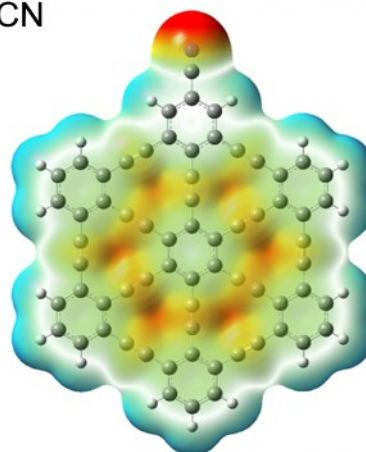

Gu2CN

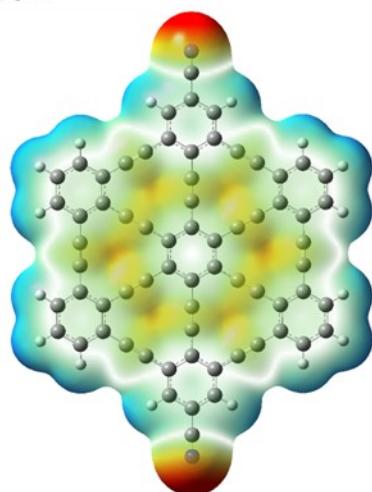

Gu3CN

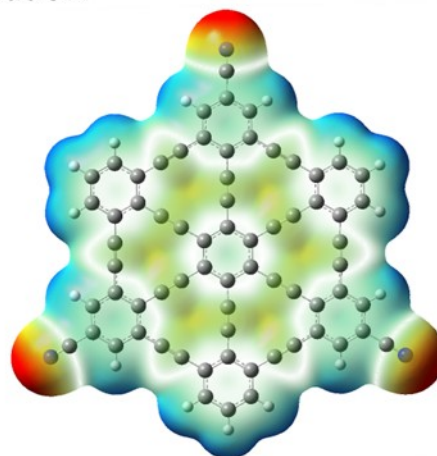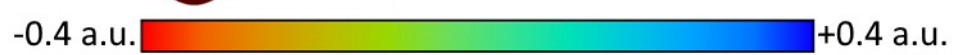



Gu4CN

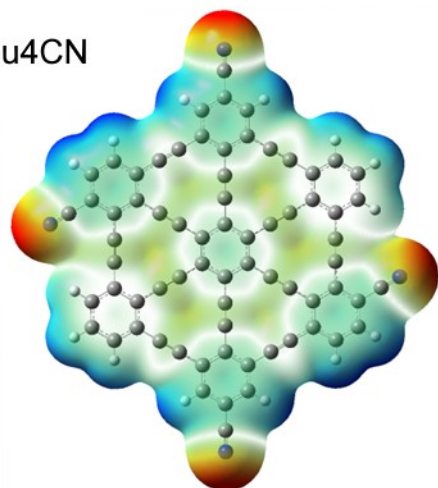

GI2CN

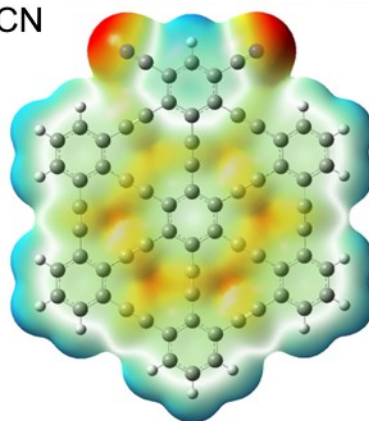

GI3CN

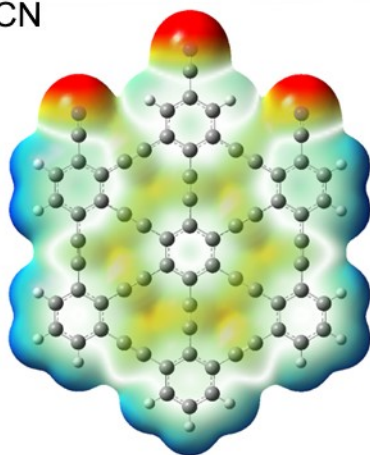

GI4CN

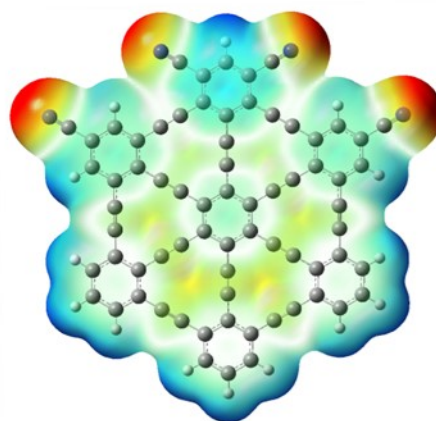

GmSOH

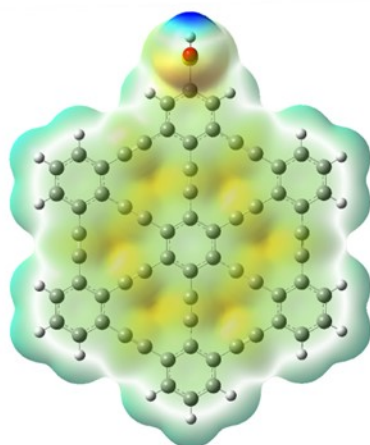

Gu2SOH

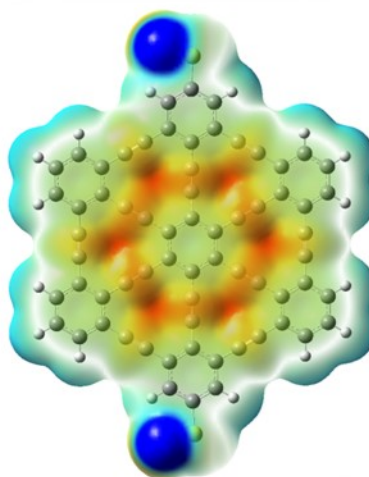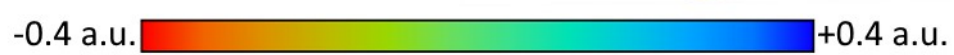

Gu3SOH

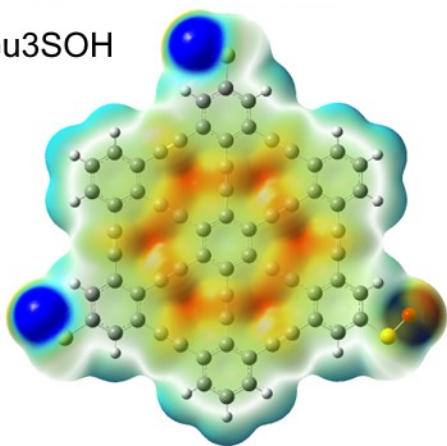

Gu4SOH

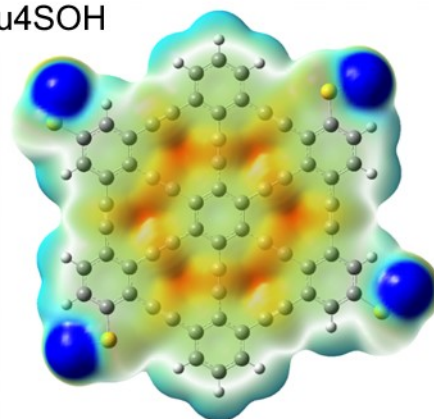

GI2SOH

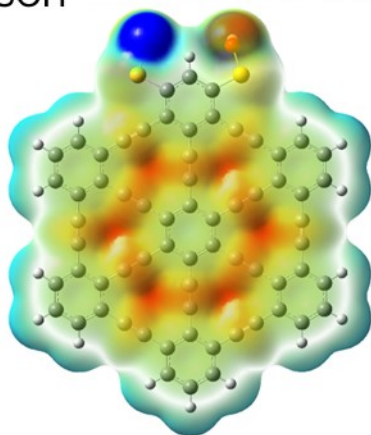

GI3SOH

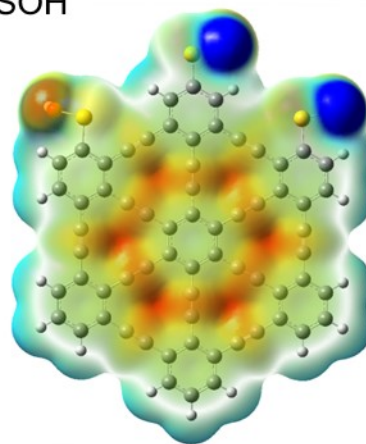

GI4SOH

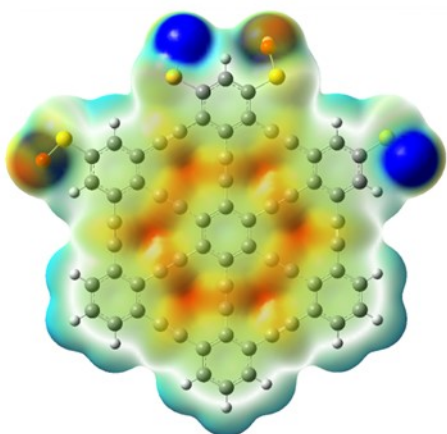

GmCF3

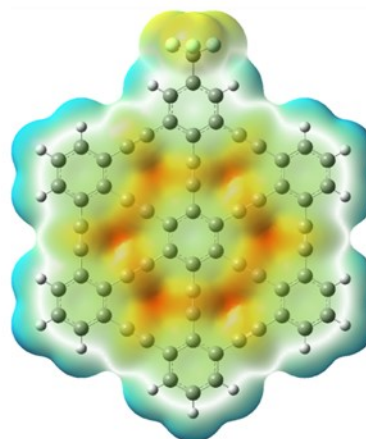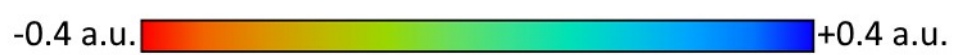



Gu2CF3

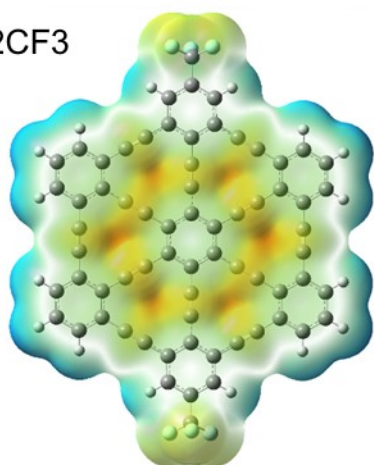

Gu3CF3

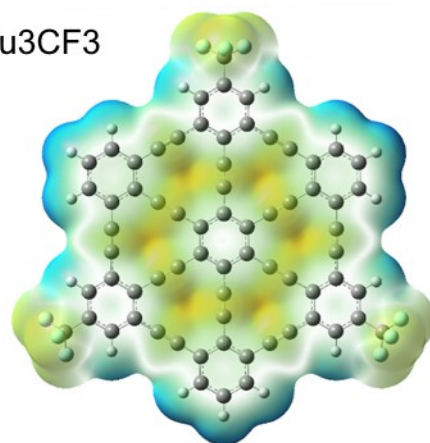

Gu4CF3

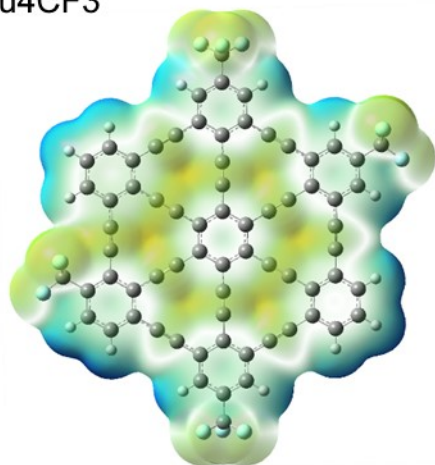

GI2CF3

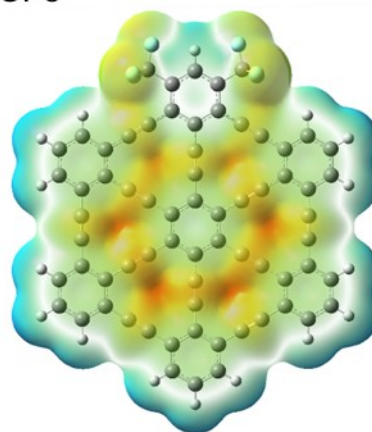

GI3CF3

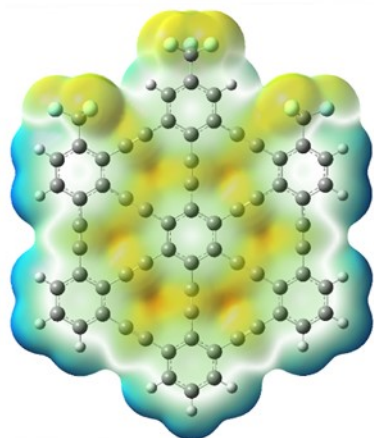

GI4CF3

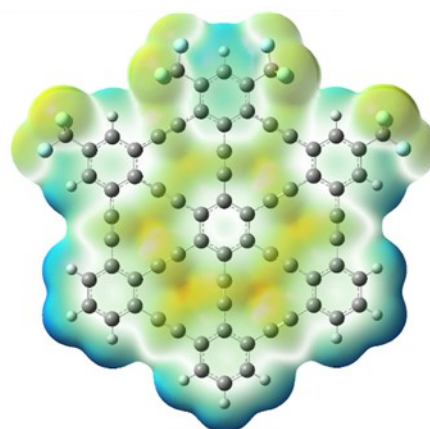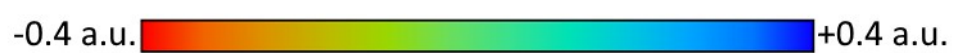

GmCCl<sub>3</sub>

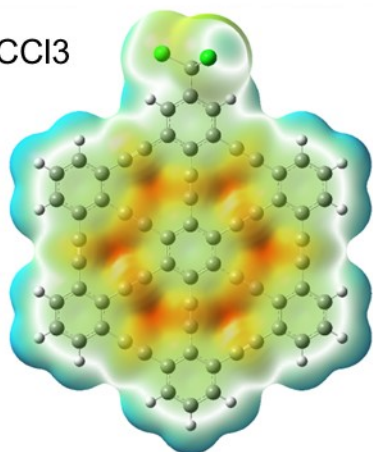

Gu2CCl<sub>3</sub>

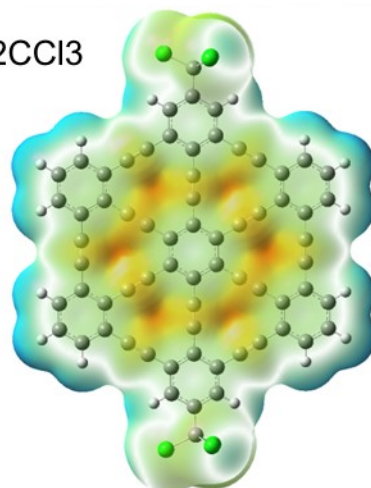

Gu3CCl<sub>3</sub>

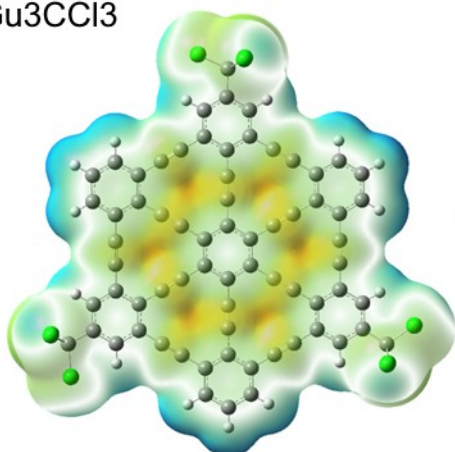

Cu4CCl<sub>3</sub>

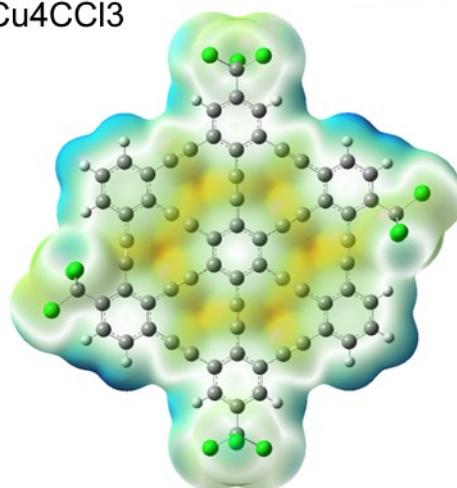

Gl2CCl<sub>3</sub>

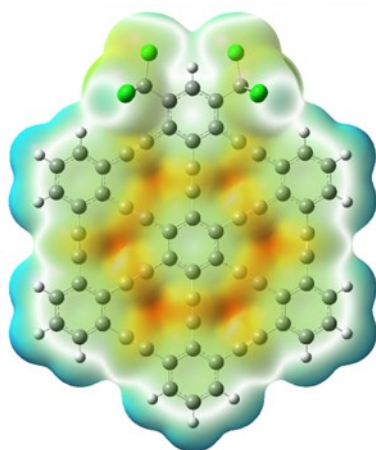

Gl3CCl<sub>3</sub>

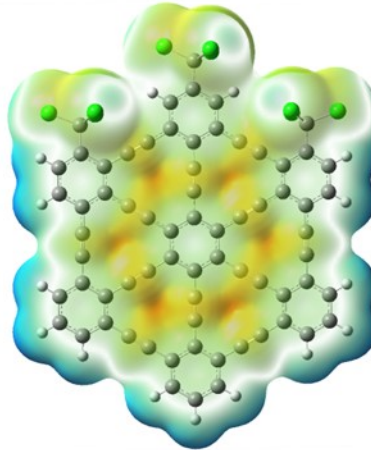

GI4CCl3

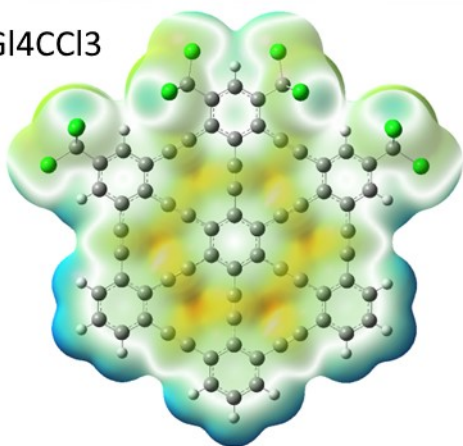

GmNMe2

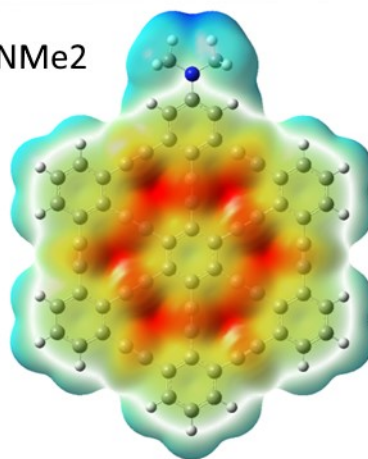

Gu2NMe2

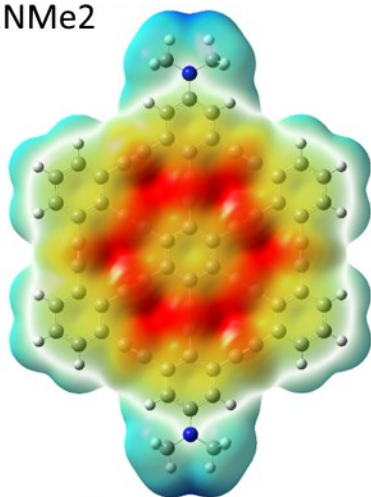

Gu3NMe2

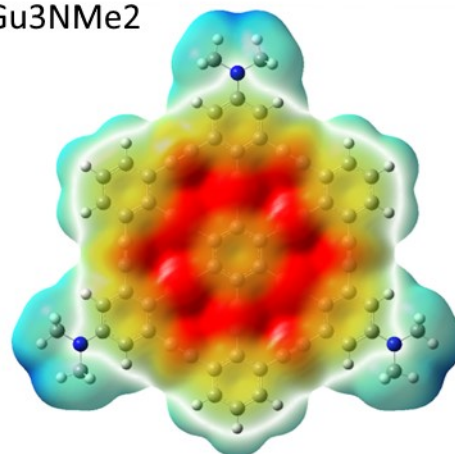

Gu4NMe2

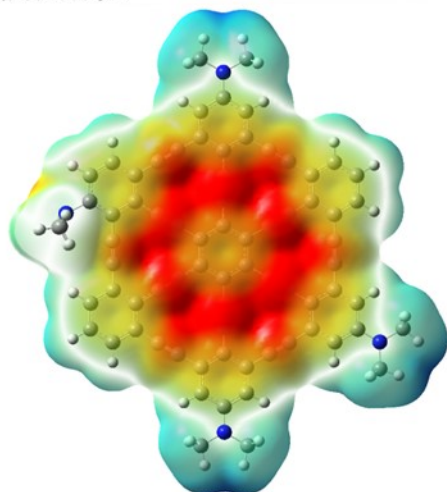

GI2NMe2

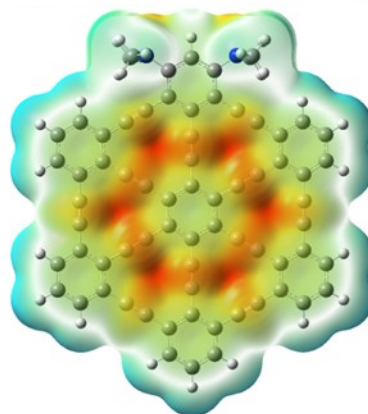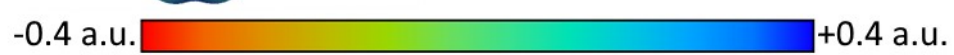



GI3NMe2

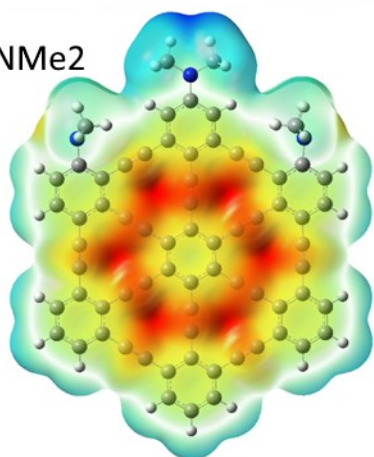

GI4NMe2

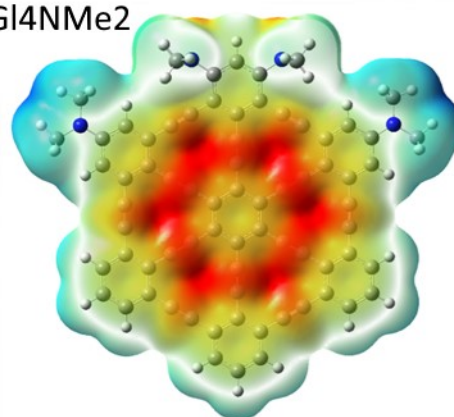

GmO

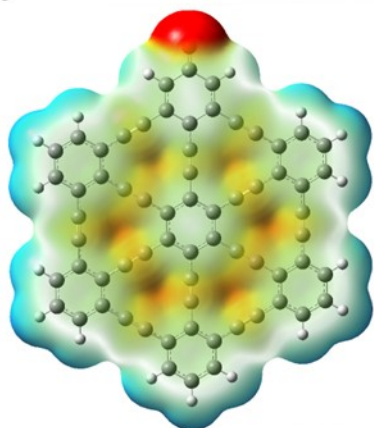

Gu2O

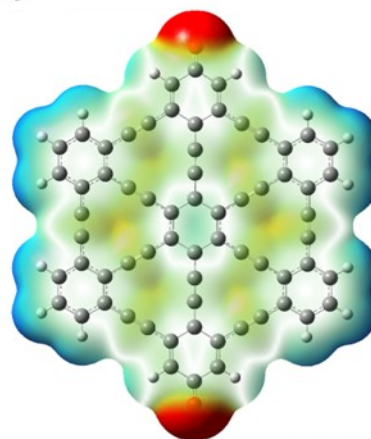

Gu3O

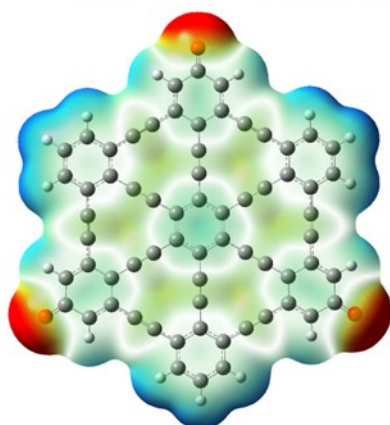

Gu4O

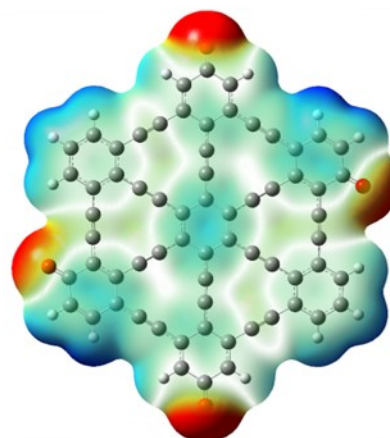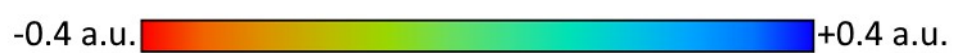

GI2O

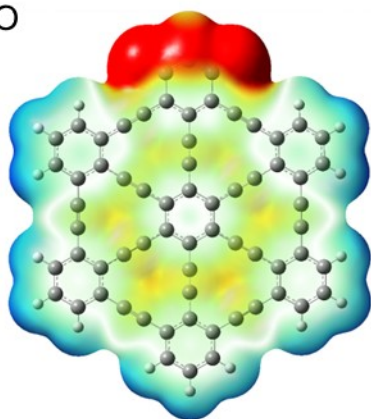

GI3O

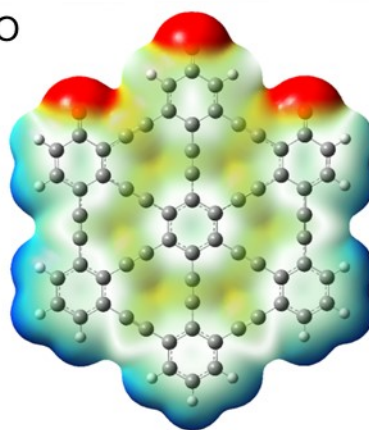

GI4O

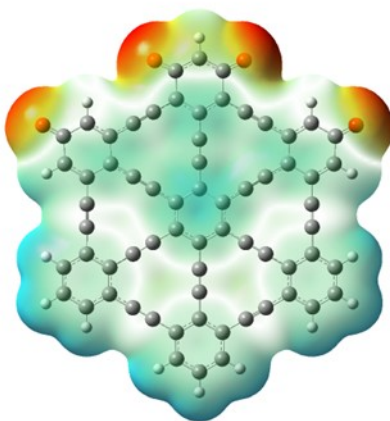

-0.4 a.u.  +0.4 a.u.

Fig. 1: Colored electrostatic potential maps on an isodensity surface of 0.001 a.u. for all graphyne compounds.



## Li<sup>+</sup> binding energies

Total geometry optimizations of lithium ions adsorbed on functionalized graphynes were carried out using the MN15/6-31+G(d,p) level of DFT. The corresponding ion binding energies were evaluated according to the following equation:

$$\Delta E_{bind} = E_{graph/Li} - E_{graph} - E_{Li} \quad (6)$$

where  $E_{graph/Li}$  denotes the energy of the graphyne with the lithium adsorbed on its surface,  $E_{graph}$  represents the energy of functionalized graphyne, and  $E_{Li}$  corresponds to the energy of the isolated lithium ion. No correction factors were applied to the basis set superposition error (BSSE), as this effect was anticipated to be negligible across all the interacting systems. The calculated  $\Delta E_{bind}$  values for all studied cases are presented in Figure 2 and compared to the pristine reference line.

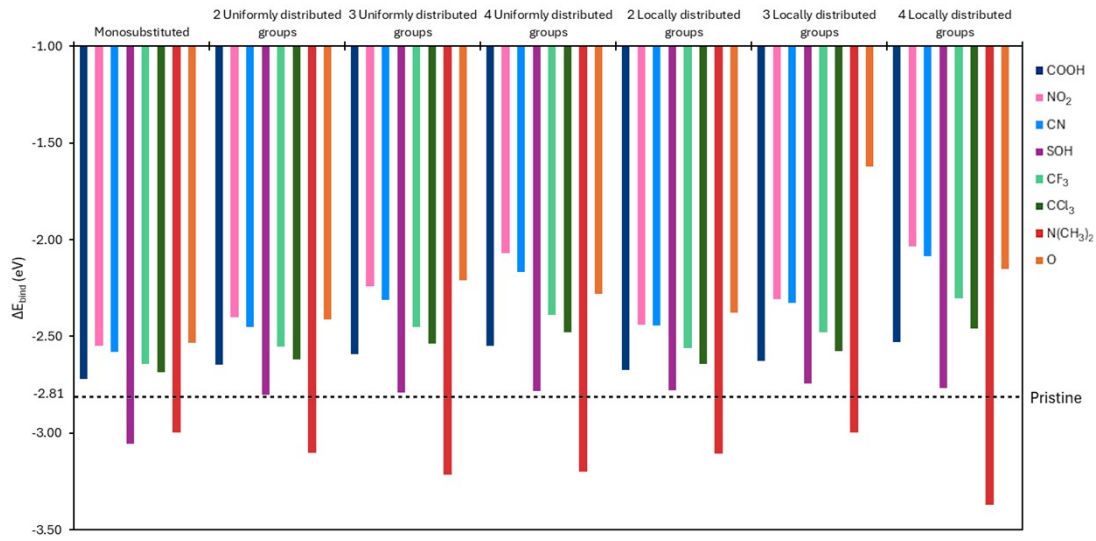

Fig. 2: Binding energies in eV for the graphyne compounds grouped by substituent configuration. The baseline for comparison is the pristine line crossing the bars with the value of -2.81 V.

## References

1. N. Daniels, Z. Wang and B. B. Laird, *J. Phys. Chem. C*, 2017, **121**, 1025-1031.
2. R. Mehra, *J. Chem. Sci.*, 2003, **115**, 147-154.
3. R. Naejus, D. Lemordant, R. Coudert and P. Willmann, *J. Chem. Thermodyn.*, 1997, **29**, 1503-1515.
4. W. J. Peppel, *Ind. Eng. Chem.*, 1958, **50**, 767-770.
5. M. Moosavi, A. Motahari, A. Vahid, V. Akbar, A. A. Rostami and A. Omrani, *J. Chem. Eng. Data*, 2016, **61**, 1981-1991.
